# Supplementary material for: Identification and isolation of lantibiotics from culture: a bioorthogonal chemistry approach
Source: Royal Society of Chemistry journal article supplement (doi:10.1039/c2ob26050f), 2012-01-01
Supplement: c2ob26050f.pdf [file c2ob26050f.pdf]

## Supplemental Figures

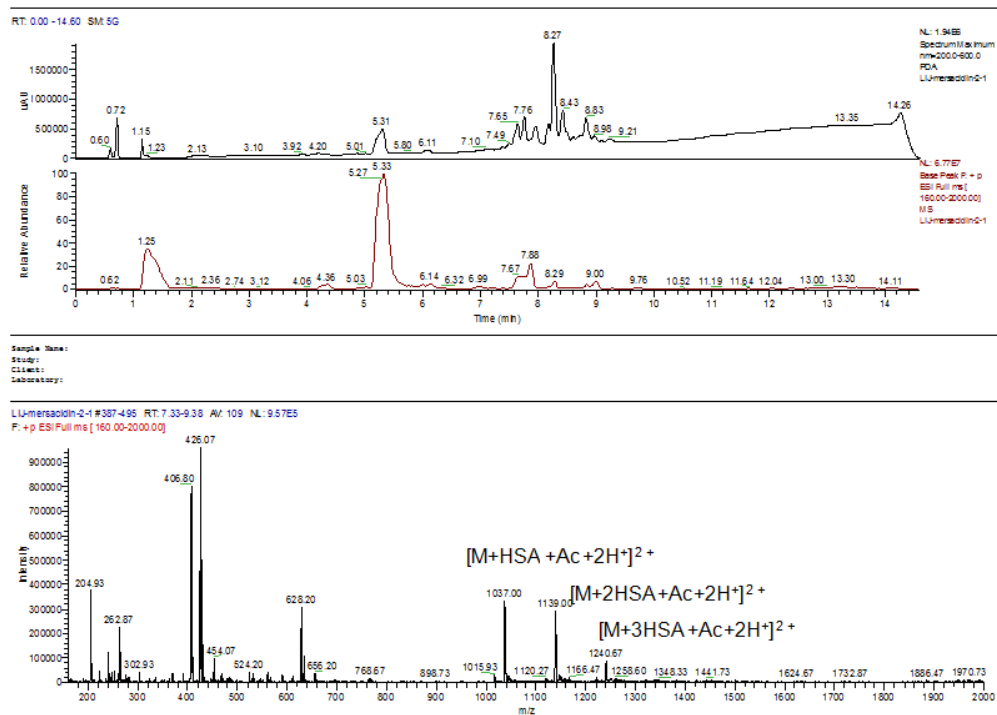

5 **Figure 1.** LC/MS spectrum after reaction of mersacidin with excess probe 1 under strong basic conditions at elevated temperature for 1 h. gradient: 10% → 90% ACN/0.1% aq. TFA.

10

15

20

25

30

35

40

5

10

15

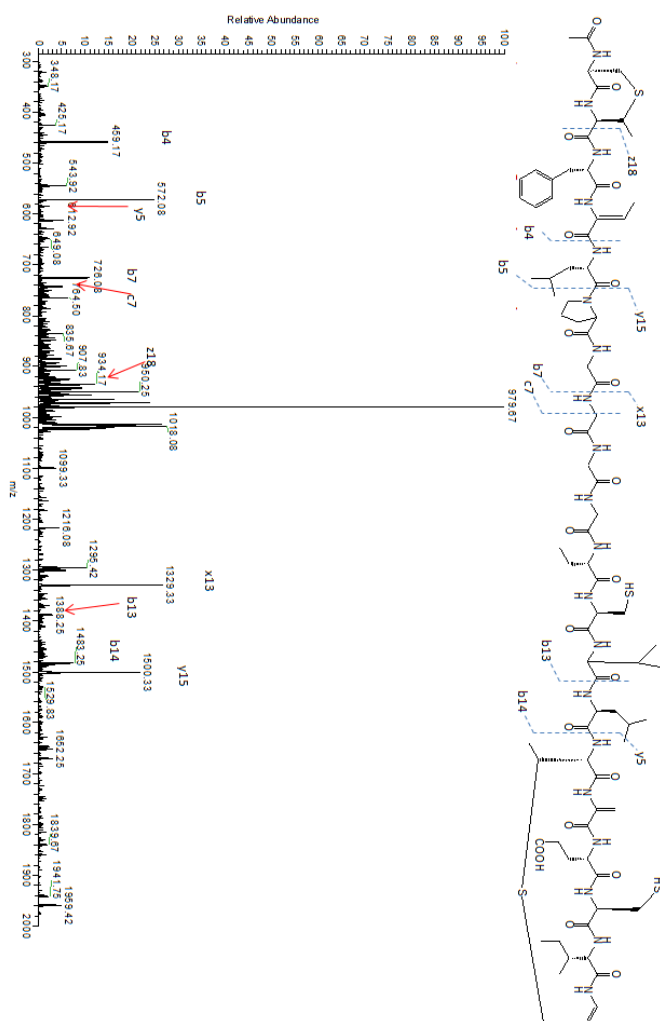

**Figure 2.** MS/MS analysis of the [M+HAS+Ac] and proposed structure of the product.

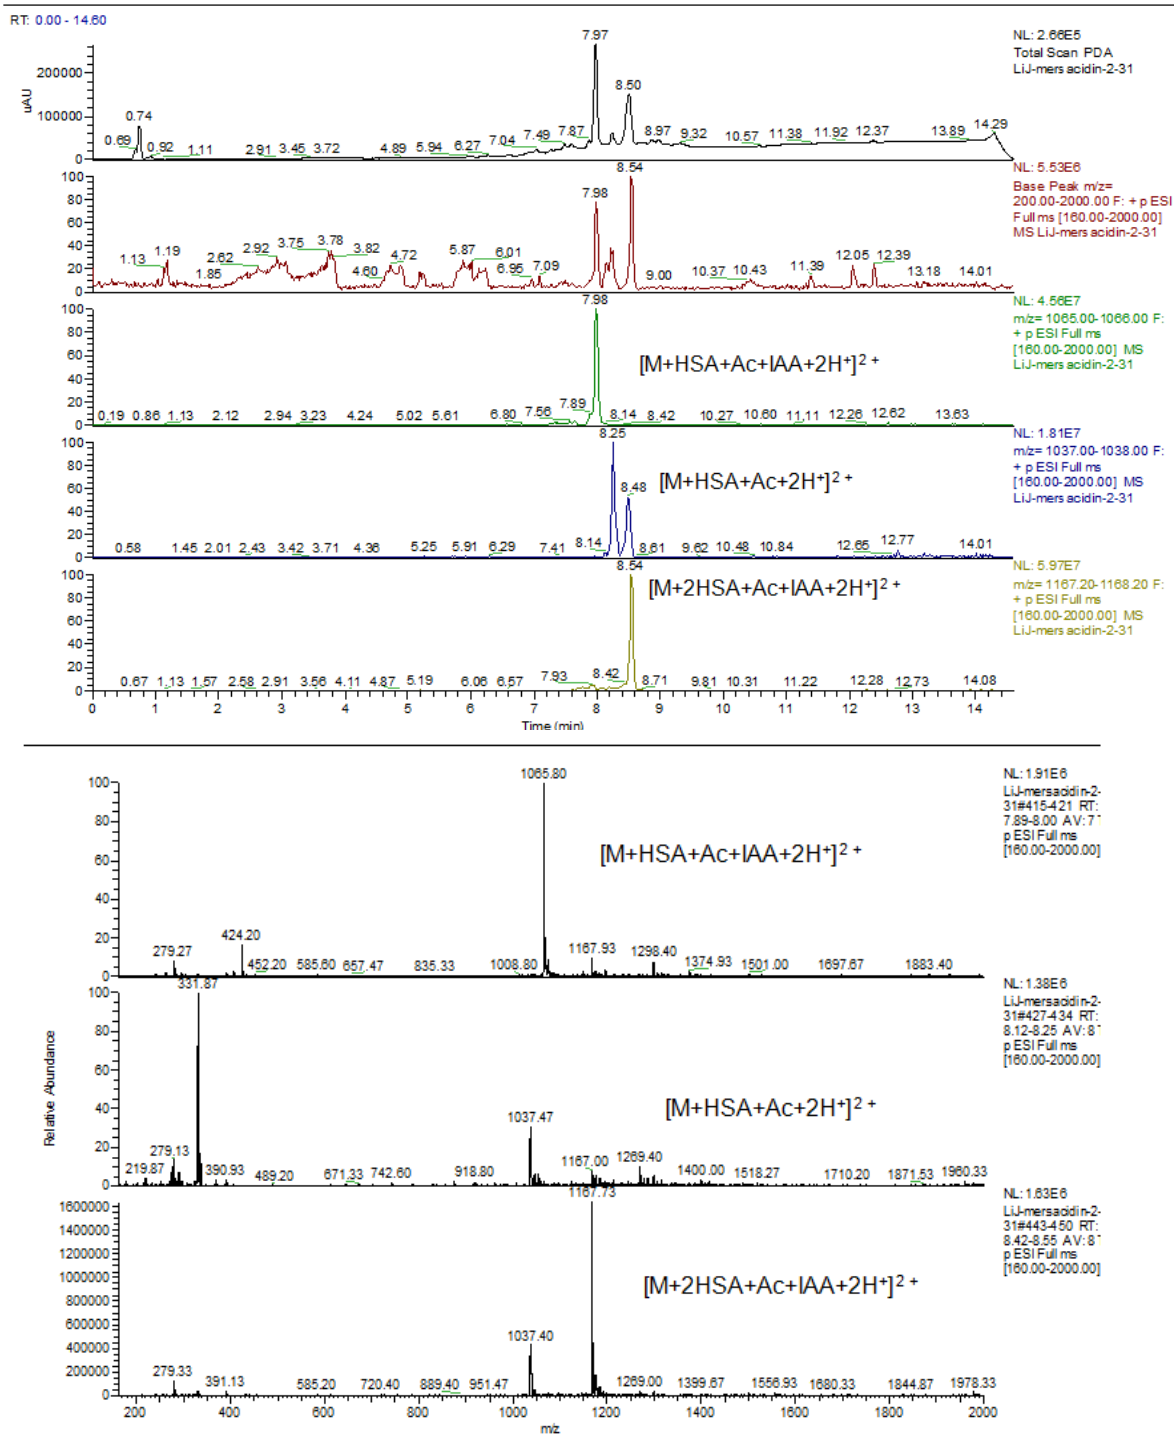

5 **Figure 3.** LC/MS spectrum of the reaction of mersacidin and thioalkyne (**1**), and DTT treatment followed by reaction with iodoacetamide. gradient: 10% → 90% ACN/0.1% aq. TFA.

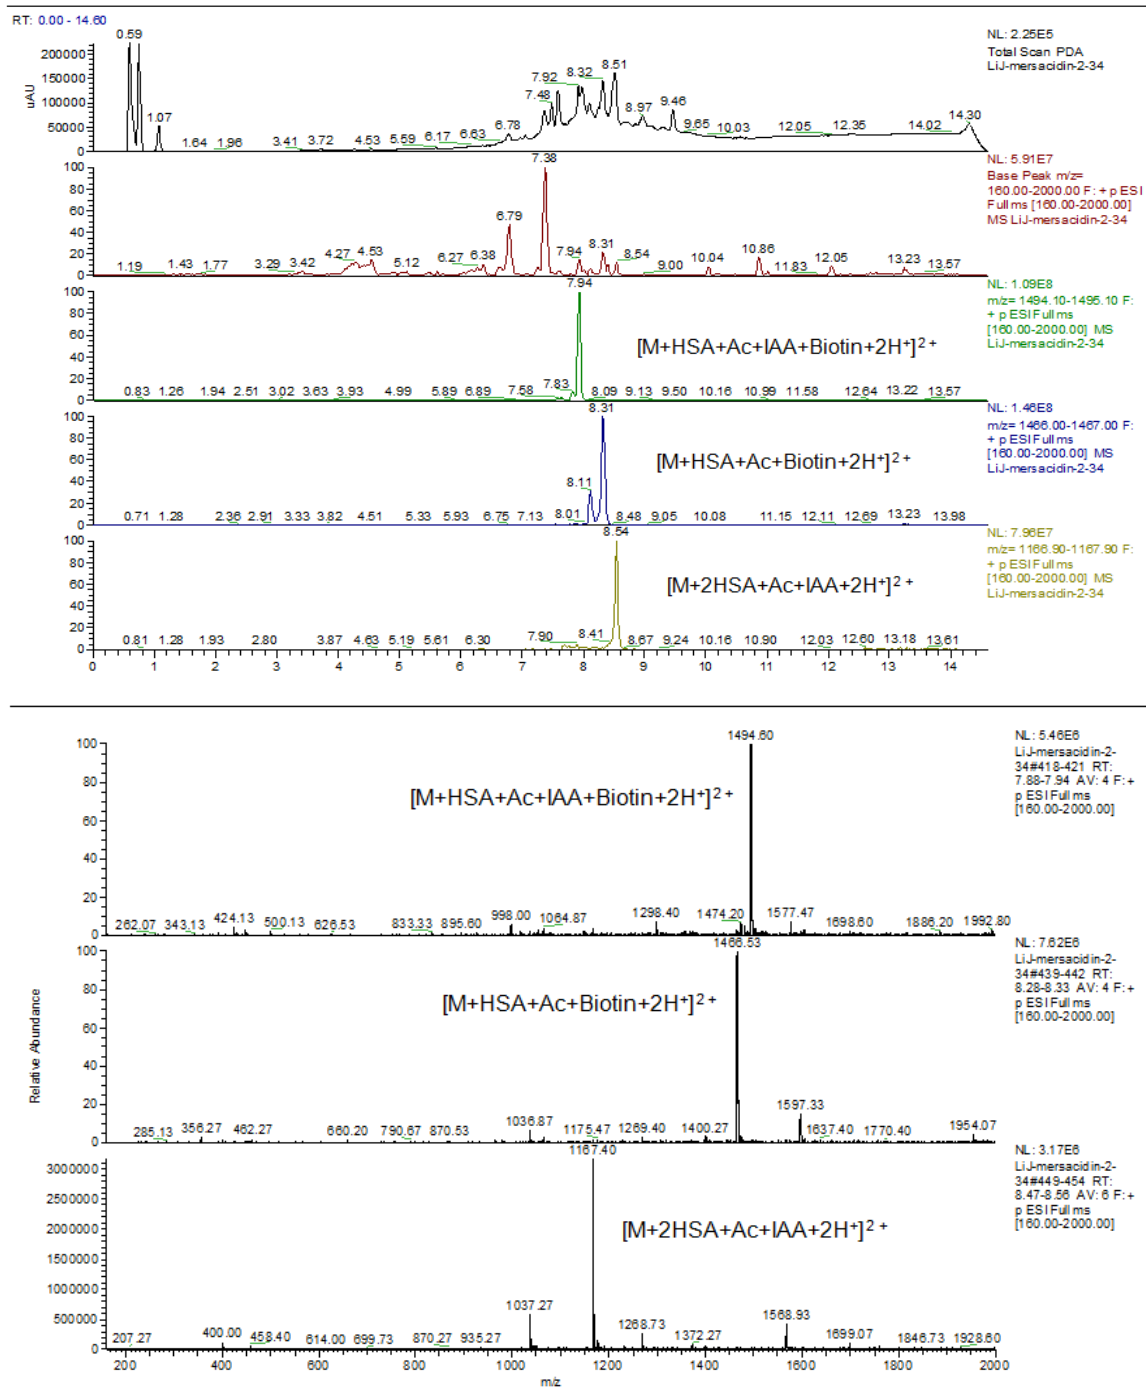

5  
**Figure 4.** LC/MS spectrum of click reaction. gradient: 10% → 90% ACN/0.1% aq. TFA.

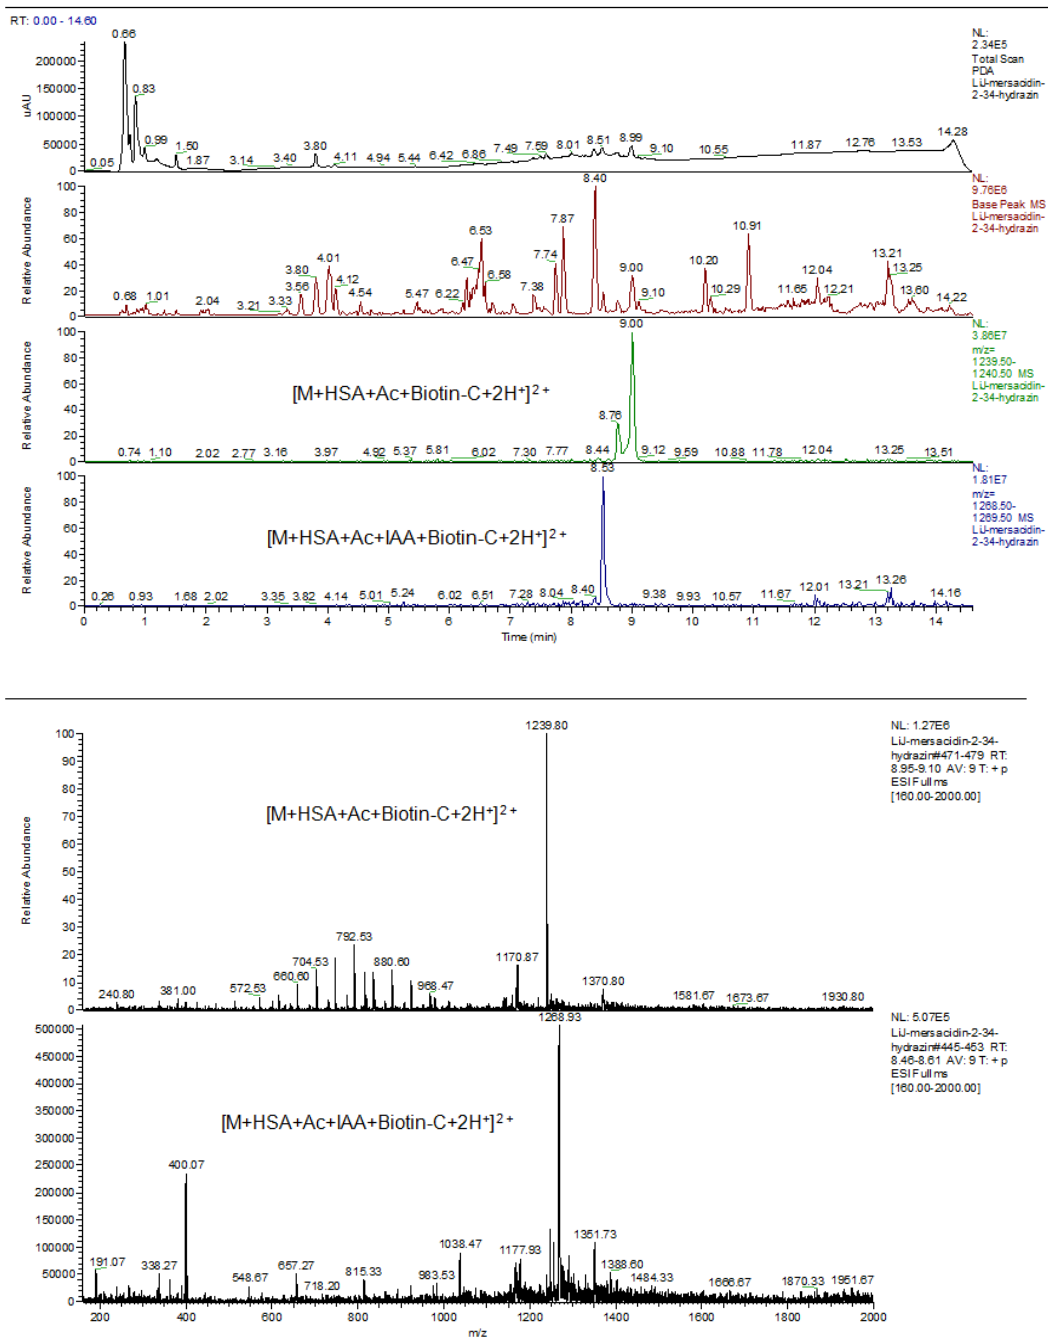

5 **Figure 5.** LC/MS spectrum of hydrazine cleavage of the fully labeled sample. Gradient 10% → 90% ACN/0.1% aq. TFA.

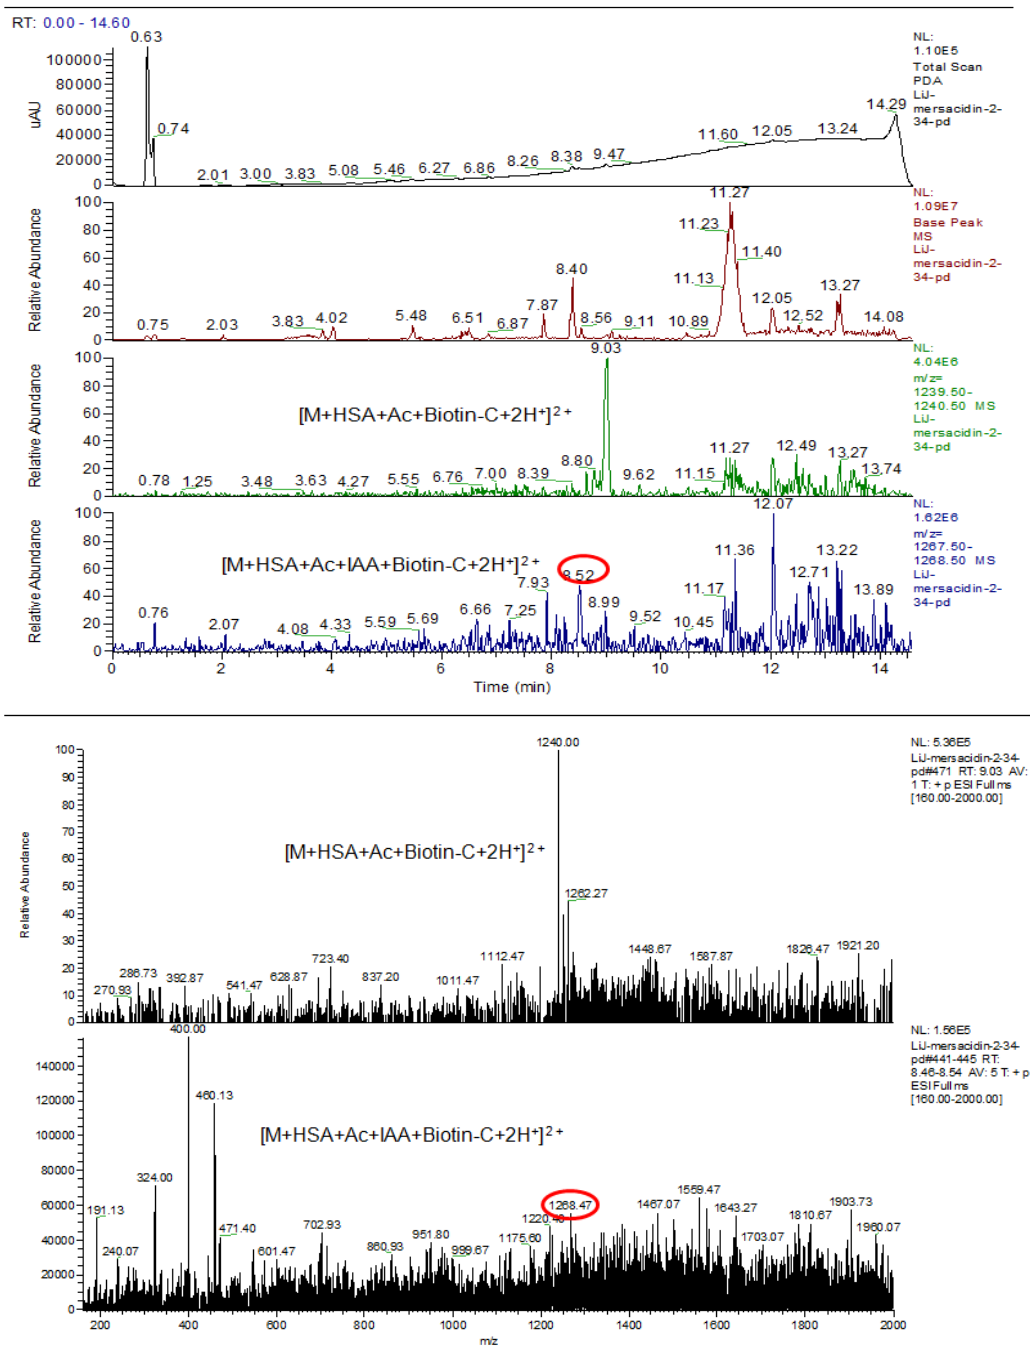

Figure 6. LC/MS of pulled down product obtained after hydrazine treatment. Gradient: 10% → 90% ACN/0.1% aq. TFA.

R:\Users\...HRMSanalyse110330\34-1-02

3/31/2011 3:50:42 PM

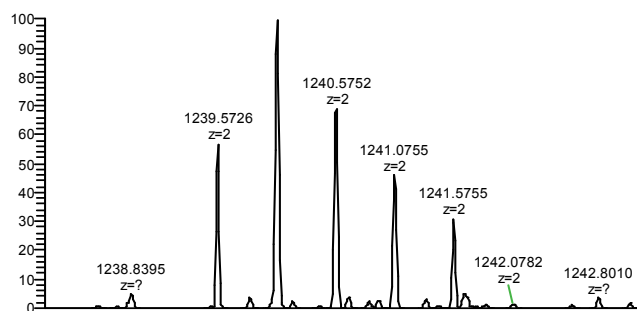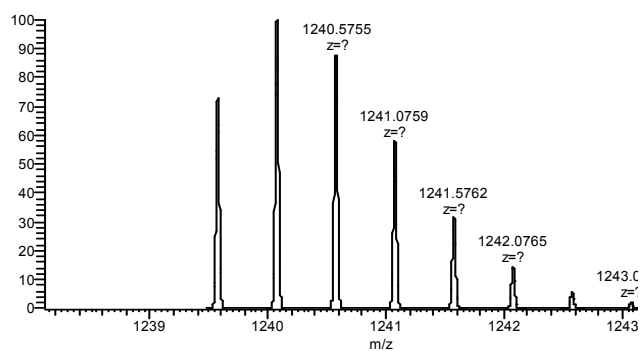

R:\Users\...HRMSanalyse110330\34-1-02

3/31/2011 3:50:42 PM

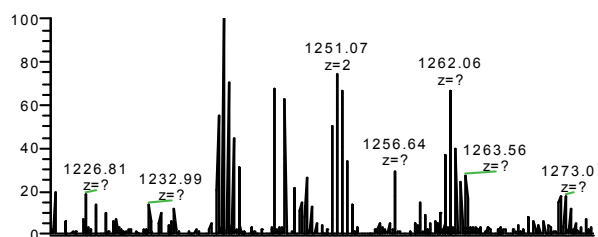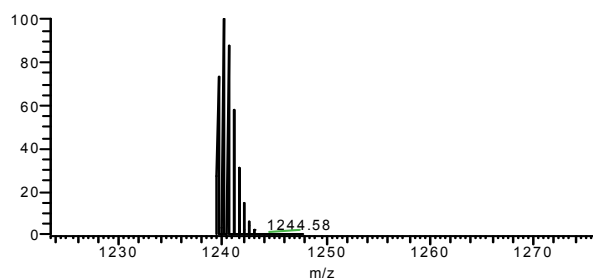

Figure 7. HRMS of modified mersacidin after pull down and hydrazine treatment.
